# Supplementary material for: Efficient Removal of Paraquat Pollutants Using Magnetic Biochar Derived from Corn Husk Waste: A Sustainable Approach for Water Remediation
Source: Hindawi journal article supplement (doi:10.1155/2023/5512881), 2023-01-01
Supplement: f1 [file 5512881.f1.docx]

**Efficient Removal of Paraquat Pollutants Using Magnetic Biochar Derived from Corn Husk Waste: A Sustainable Approach for Water Remediation**

*Sakonsupa Damdib a,* *Adisak Siyasukh b,c*,* *Bhawaranchat Vanichsetakul a,*

a Bio-Circular-Green economy technology and engineering center (BCGeTEC),

Department of Chemical Engineering, Faculty of Engineering, Chulalongkorn University, Bangkok 10330, Thailand

b Research Laboratory of Pollution Treatment and Environmental Material (PTEM), Department of Industrial Chemistry, Faculty of Science, Chiang Mai University, Chiang Mai 50200, Thailand

c Materials Science Research Center, Faculty of Science, Chiang Mai University, Chiang Mai 50200, Thailand

d National Center for Metal and Materials Technology Center (MTEC), Science Park, 12120, Klong Luang, Pathumthani, Thailand, Thailand

e Department of Environmental Engineering, Faculty of Engineering, Chulalongkorn University, Bangkok 10330, Thailand

f Research Unit Control of Emerging Micropollutants in Environment, Chulalongkorn University, Bangkok 10330, Thailand

*Corresponding author: Adisak Siyasukh

email: [adisak.si@cmu.ac.th](mailto:adisak.si@cmu.ac.th) Tel: +66 946241259

**Corresponding author: Nattaporn Tonanon

email: [nattaporn.t@chula.ac.th](mailto:nattaporn.t@chula.ac.th) Tel: +66 866291818


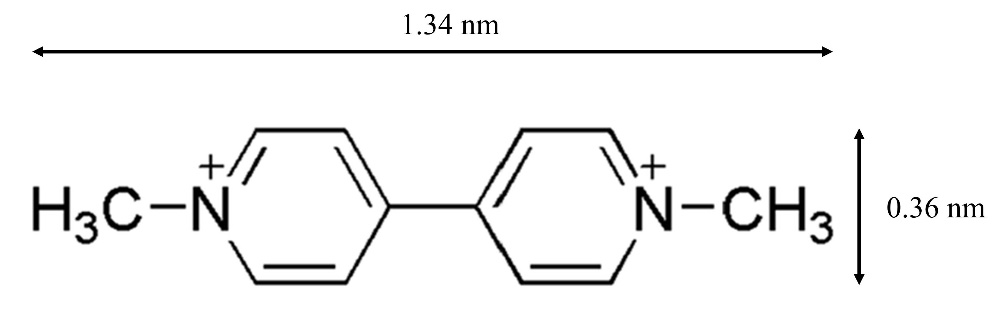


Fig. S1. Molecular structure of paraquat


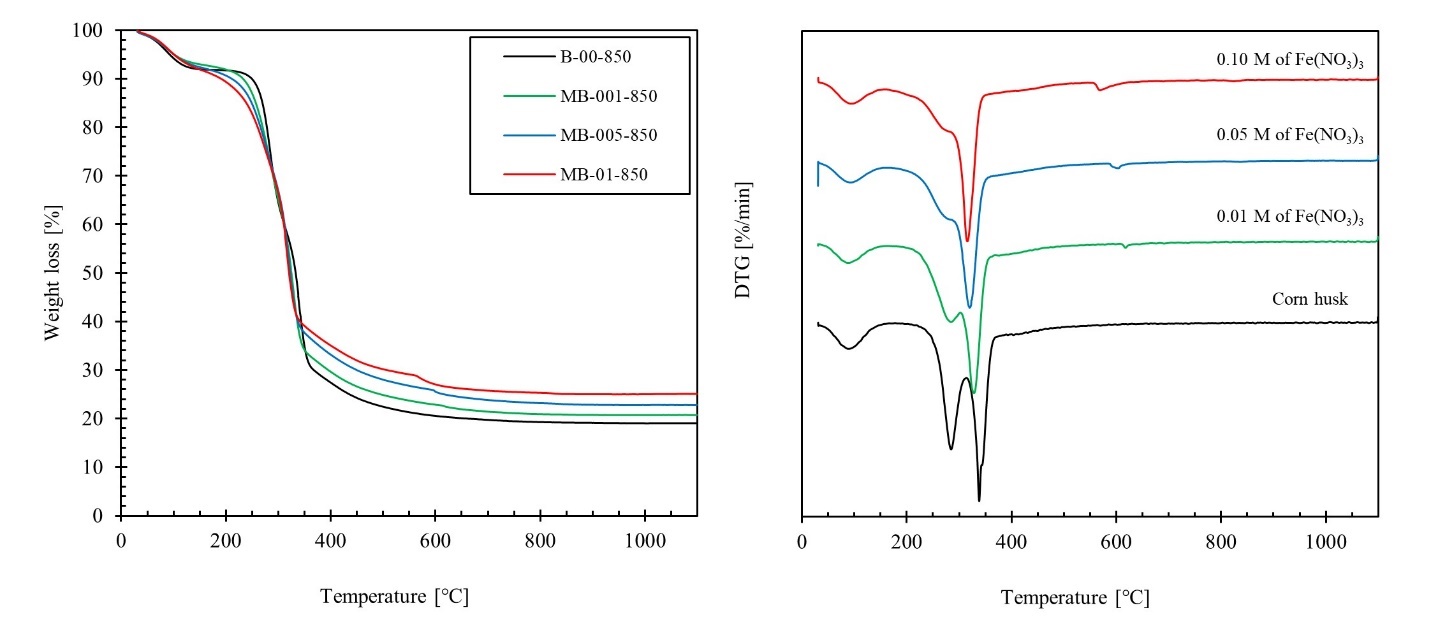


Fig. S2. (a) TGA curves of B-00-850, MB-001-850, MB-005-850, and MB-01-850 and (b) DTG curves of corn husk and corn husks immersed Fe(NO3)3 at concentration of 0.01, 0.05, 0.10 M


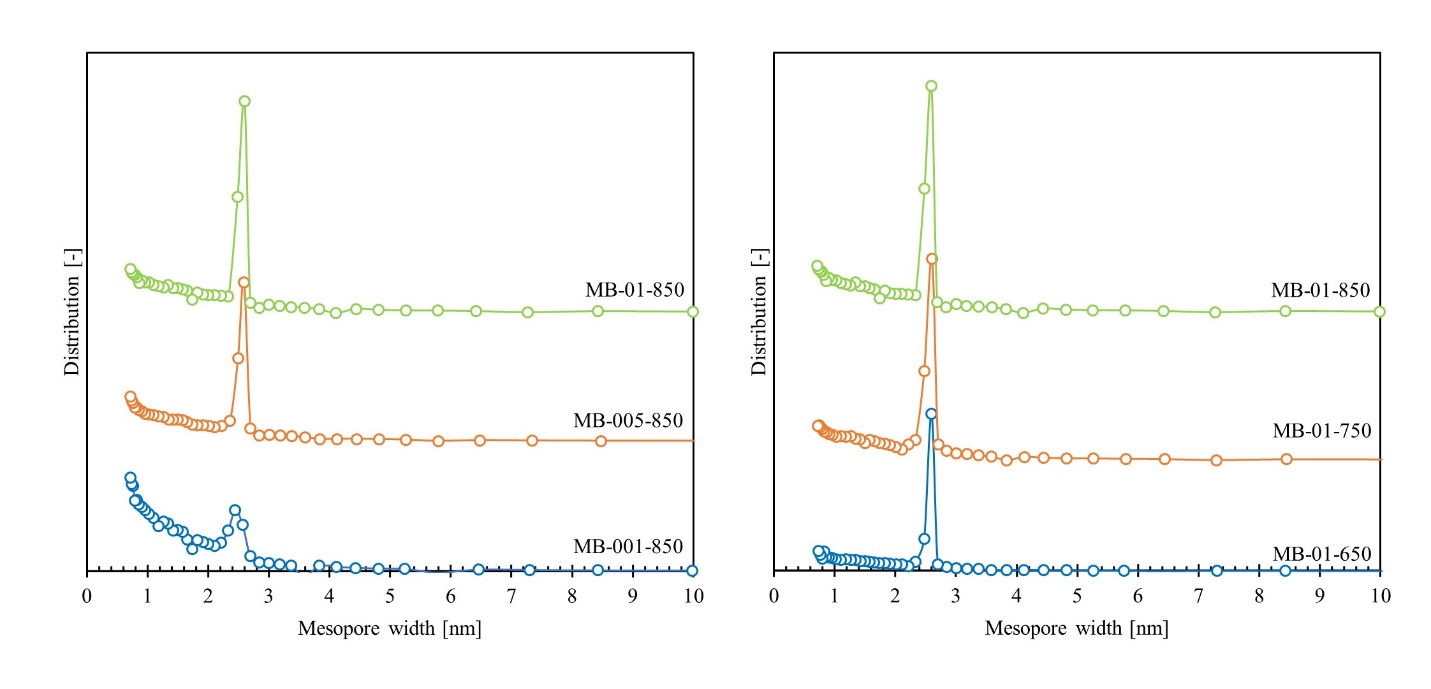


Fig. S3. Mesopore size distribution of (a) MB-001-850, MB-005-850, MB-01-850 (b) MB-01-650, MB-01-750, MB-01-850


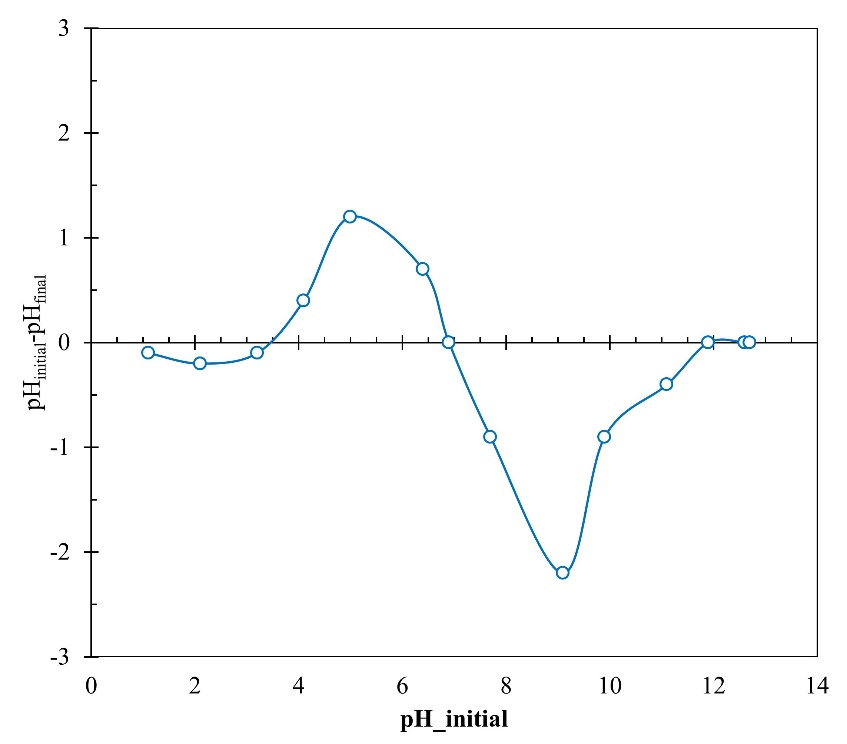


Fig. S4. Point of zero charge (pHPZC) of MB-01-850

Table S1. Residual mass and %burn-off of corn and corn with activated Fe(NO3)3

| Concentration of  Fe(NO3)3 | Residual mass | %Burn-off |
| --- | --- | --- |
| 0.00 | 19.05 | 80.95 |
| 0.01 | 20.73 | 79.27 |
| 0.05 | 22.80 | 77.20 |
| 0.10 | 25.07 | 74.93 |

Table S2. Chemical compositions of B-00-850 and MB-01-850

| Sample | Chemical compositions | | | | | |
| --- | --- | --- | --- | --- | --- | --- |
| Atomic% | | | Weight% | | |
| C | O | Fe | C | O | Fe |
| B-00-850 | 91.33 | 8.67 | 0.00 | 88.78 | 11.12 | 0.00 |
| MB-01-850 | 79.76 | 14.20 | 6.04 | 62.92 | 14.92 | 22.16 |

Table S3. Intraparticle diffusion parameters for PQ adsorption onto MB-01-850

| Sample | Kp,1 (mg/gꞏmin1/2) | C1 | R2 (-) | Kp,2  (mg/gꞏmin1/2) | C2 | R2 (-) | Kp,3 (mg/gꞏmin1/2) | C3 | R2(-) |
| --- | --- | --- | --- | --- | --- | --- | --- | --- | --- |
| MB-01-850 | 14.68 | 0.09 | 0.9215 | 2.51 | 32.72 | 0.9355 | 0.02 | 60.03 | 0.9000 |

Table S4. Chemical oxygen demand (COD) value of natural water with and without PQ

| Samples | COD (mg/L) |
| --- | --- |
| Natural water | 8.9 |
| Natural water with PQ (before adsorption) | 17 |
| Natural water with PQ (after adsorption) | 5.1 |
